1  
2  
3  
4  
5  
6  
7  
8  
9  
10  
11  
12  
13  
14  
15  
16  
17  
18  
19  
20  
21  
22  
23  
24  
25  
26  
27  
28  
29  
30  
31  
32

**The *p*-coumaroyl arabinoxylan transferase *HvAT10* underlies natural variation in whole-grain cell wall phenolic acids in cultivated barley**

Kelly Houston<sup>1§</sup>, Amy Learmonth<sup>2§</sup>, Ali Saleh Hassan<sup>3,4§</sup>, Jelle Lahnstein<sup>3</sup>, Mark Looseley<sup>5</sup>, Alan Little<sup>3</sup>, Robbie Waugh<sup>1,2,3\*</sup>, Rachel A Burton<sup>3\*</sup>, Claire Halpin<sup>2\*</sup>

§ Authors contributing equally

\*Corresponding authors: Robbie Waugh, Rachel A Burton, Claire Halpin

<sup>1</sup>Cell and Molecular Sciences, The James Hutton Institute, Errol Road Invergowrie, Dundee, DD2 5DA, Scotland, UK.

<sup>2</sup>Division of Plant Sciences, School of Life Sciences, University of Dundee at The James Hutton Institute, Invergowrie, Dundee, DD2 5DA, Scotland, UK.

<sup>3</sup>School of Agriculture, Food and Wine, University of Adelaide, Urrbrae SA 5064

**Current affiliation if different to those above**

Ali Saleh Hassan;

<sup>4</sup>CSIRO Agriculture and Food, Waite campus, Wine Innovation West Bld, Hartley Grove, Urrbrae, SA 5064,

Mark Looseley;

<sup>5</sup>Xelect Ltd, Horizon House, Abbey Walk, St Andrews, Fife, KY16 9LB, Scotland, UK

Communicating Author: Claire Halpin

e-mail: c.halpin@dundee.ac.uk

tel: +44 (0) 1382 568775

**Keywords:** barley, *p*-coumarate, ferulate, GWAS

33 **Phenolic acids in cereal grains have important health-promoting properties and influence**  
34 **digestibility for industrial or agricultural uses. Here we identify alleles of a single BAHD *p*-**  
35 **coumaroyl arabinoxylan transferase gene, *HvAT10*, as responsible for the natural variation in cell**  
36 **wall-esterified *p*-coumaric and ferulic acid in whole grain of a collection of cultivated two-row**  
37 **spring barley genotypes. We show that *HvAT10* is rendered non-functional by a premature stop**  
38 **codon mutation in approximately half of the genotypes in our mapping panel. The causal**  
39 **mutation is virtually absent in wild and landrace germplasm suggesting an important function for**  
40 **grain arabinoxylan *p*-coumaroylation pre-domestication that is dispensable in modern agriculture.**  
41 **Intriguingly, we detected detrimental impacts of the mutated locus on barley grain quality traits.**  
42 **We propose that *HvAT10* could be a focus for future grain quality improvement or for**  
43 **manipulating phenolic acid content of wholegrain food products.**

44 Phenolic acids in the cell walls of cereals limit digestibility<sup>1</sup> when grain or biomass is used for animal  
45 feed or processed to biofuels and chemicals. They are also important dietary antioxidant, anti-  
46 inflammatory and anti-carcinogenic compounds and contribute to beer flavour and aroma<sup>2,3</sup>. The  
47 hydroxycinnamates, *p*-coumarate and ferulate (*p*CA and FA respectively), are the major phenolic  
48 acids in grasses. Both occur as decorations ester-linked to cell wall arabinoxylan. Lignin also has  
49 esterified *p*CA decorations but FA in lignin is incorporated directly into the growing polymer by ether  
50 linkages<sup>4</sup>. Besides its role as a lignin monomer, FA in the cell wall acts to cross-link arabinoxylans to  
51 each other and to lignin, and it is this cross-linking that may impede digestibility. The role of *p*CA in  
52 cell walls is less clear. In lignin, it may promote polymerisation of sinapyl alcohol monolignols<sup>5</sup> and  
53 act as a termination unit<sup>4</sup>, but there are no clear theories about its role when attached to  
54 arabinoxylans. Given the importance of *p*CA and FA to plant health and the uses of cereal crops,  
55 there has been much recent interest in identifying genes that can be manipulated in transgenic  
56 plants to influence phenolic acid content<sup>6-14</sup>. Given current GM legislation in some countries it  
57 would be more appropriate for crop improvement to identify genes and alleles determining natural  
58 variation in *p*CA and FA that could be exploited immediately in contemporary plant breeding.

59 We quantified cell wall-esterified *p*CA and FA in the wholegrain of a replicated GWAS panel of 211  
60 elite 2-row spring barley cultivars grown in a field polytunnel. We observed a 6-fold variation for  
61 esterified *p*CA (54 µg/g - 327 µg/g) and a greater than 2-fold variation in esterified FA (277 µg/g - 748  
62 µg/g) (Supplementary Fig. 1a,b, Supplementary Data 1, 2) with no correlation between FA and *p*CA  
63 levels ( $R^2 = 0.04$ ). A GWAS of this data using 43,834 SNP markers identified a single highly significant  
64 association for grain esterified *p*CA on chromosome 7H ( $-\log_{10}(p)=13.9$ ; Fig. 1a, Supplementary Data  
65 3) and a co-locating peak for FA just below statistical significance ( $-\log_{10}(p)=3.9$ ; Fig. 1b,

66 Supplementary Data 3). Given the closeness of FA and *p*CA on the phenylpropanoid pathway we  
67 also conducted a GWAS using FA:*p*CA concentration ratios which provides internal data  
68 normalisation, reducing inherent variability in single compound measurements<sup>15</sup>. Mapping  
69 log[FA:*p*CA] values increased both the strength and significance of association with the locus (-  
70 log<sub>10</sub>(p)=19.4; Fig. 1c, Supplementary Fig. 2c, Supplementary Data 3), confirming a level of  
71 dependency between esterified FA and esterified *p*CA concentrations. GWAS on similar data from a  
72 semi-independent set of 128 greenhouse-grown barley genotypes identified the same associations  
73 (Supplementary Fig. 2a-c, Supplementary Data 3).

74 The entire region above the adjusted false discovery rate (FDR) threshold for the log[FA:*p*CA] values  
75 spanned a 65.7MB segment of chromosome 7H (459,131,547bp - 524,825,783bp) containing 347  
76 high-confidence gene models. We surveyed this region for genes involved in phenolic acid or cell  
77 wall biosynthesis. This revealed several candidates including two cinnamyl alcohol dehydrogenases  
78 (*CADs*), a caffeate-O-methyltransferase (*HvCOMT1*<sup>16</sup>) and three *BAHD* acyltransferases.  
79 Interrogation of an RNA-seq dataset for 16 barley tissues<sup>17</sup> revealed that five of these six candidates  
80 exhibited moderate to low levels of expression across all surveyed tissues (Fig. 2a). However, the  
81 *BAHD* gene HORVU7Hr1G085100 stood out as being highly expressed in the hull lemma and palea  
82 where 80% of grain *p*CA is found<sup>18</sup> (Fig. 2a, b). We then consulted a database of variant calls from a  
83 barley RNA-seq dataset that included 118 of our GWAS genotypes<sup>19</sup>. We observed no SNP variation  
84 in two of the candidate genes. Three had one SNP each; *COMT1* (HORVU7Hr1G082280) had a  
85 synonymous SNP, one *CAD* (HORVU7Hr1G079380) a SNP in the 3' UTR and one *BAHD*  
86 (HORVU7Hr1G085390) a non-synonymous but rare SNP. None appeared likely to impair gene  
87 function. However, the *BAHD* HORVU7Hr1G085100 had 3 SNPs including one causing a premature  
88 stop codon leading to loss of a third of the protein sequence. BLASTp of the predicted full-length  
89 HORVU7Hr1G085100 protein sequence revealed it was 79% identical to rice *OsAT10*  
90 (LOC\_Os06g39390.1), a gene functionally characterised as a *p*-coumaroyl CoA arabinoxylan  
91 transferase<sup>7</sup>. Critically, overexpression of *OsAT10* in rice dramatically increases cell wall-esterified  
92 *p*CA levels in leaves while concomitantly reducing the levels of esterified FA<sup>7</sup>. A maximum likelihood  
93 phylogenetic tree of *BAHD* gene sequences confirmed HORVU7Hr1G085100 as *HvAT10* (Fig. 2c) and  
94 another of our candidates, HORVU7Hr1G085390, as a possible *HvAT10* paralog with negligible  
95 expression in the tissues surveyed (Fig. 2a). The third *BAHD*, HORVU7Hr1G085060, is likely an  
96 AT8<sup>7,13</sup>.

97 To more accurately document polymorphisms in *HvAT10*, we PCR-sequenced the gene from 52  
98 genotypes of the GWAS panel (Supplementary Data 1). Two nonsynonymous SNPs, one in each of

99 *HvAT10*'s two exons (Fig. 3a), were in complete linkage disequilibrium across the 52 lines. A G/A  
100 SNP at 430bp translates to either a valine or isoleucine, substituting one non-polar, neutral amino  
101 acid for another, so unlikely to affect function. By contrast, a C/A SNP at 929bp produces either  
102 serine in the full length protein, or a premature stop codon that truncates the protein by 124 amino  
103 acids, removing the BAHD family conserved DFGWG motif (DVDYG in barley and other grasses)  
104 thought to be essential for catalysis<sup>20-22</sup> (Fig. 3b). The *at10<sup>STOP</sup>* mutation is therefore predicted to  
105 knock-out gene function. We designed a diagnostic Kompetitive Allele Specific PCR (KASP) assay to  
106 distinguish the two *HvAT10* alleles and genotyped all 212 cultivars in our GWAS population  
107 (Supplementary Table 1). Consistent with the hypothesis that *at10<sup>STOP</sup>* is the causal variant  
108 underlying the log[FA:pCA] GWAS peak, no SNP scored higher than the KASP diagnostic when  
109 included in the GWAS although one, JHI-Hv50k-2016-488774, in complete LD scored equally highly.  
110 *HvAT10* had a minor allele frequency of 0.48 and appears to significantly influence levels of both pCA  
111 ( $p=4.30e-19$ ) and FA in grain ( $p=1.80e-11$ ) with the median for *at10<sup>STOP</sup>* genotypes being 28% lower  
112 for pCA (Fig. 3c) and 14% higher for FA (Fig. 3d) than those with the wildtype allele. Comparing the  
113 median log[FA:pCA] for *at10<sup>STOP</sup>* cultivars (0.58) to the wildtype cultivar group (0.37) showed an even  
114 higher significant difference between the groups ( $p=7.56e-50$ ) (Fig. 3e, Supplementary Fig. 3).

115 In contrast to our initial observation on the whole population, plotting grain esterified pCA against  
116 FA (Fig. 3f) within each allele group now reveals positive correlations, suggesting that although flux  
117 into phenolic acid biosynthesis may differ between cultivars, it co-ordinately affects both phenolic  
118 acids. The *at10<sup>STOP</sup>* genotypes show approximately one-third less pCA than wildtype genotypes  
119 reflecting a deficiency of pCA on arabinoxylan in cultivars that lack a functional *p*-coumaroyl CoA  
120 arabinoxylan transferase. Nevertheless, two-thirds of cell wall esterified pCA remains since most pCA  
121 is associated with lignin<sup>23,24</sup> through the action of other BAHD genes. The influence of *at10<sup>STOP</sup>* on FA  
122 is evidenced by considering the 27 cultivars with grain esterified FA above 600  $\mu\text{g/g}$ ; 23 of these  
123 have the *at10<sup>STOP</sup>* allele (Fig. 3f; Supplementary Data 1). This effect on FA might occur in several  
124 ways: pCA that cannot be esterified onto arabinoxylan could be methoxylated to produce FA thereby  
125 increasing FA pools for transfer onto arabinoxylan, or alternatively, pCA and FA may compete for  
126 transfer onto a shared acceptor (likely UDP-arabinose<sup>12</sup>) before incorporation into arabinoxylan such  
127 that loss of pCA transfer by *HvAT10* leaves more free acceptor for FA transfer. Either mechanism  
128 could explain how *at10<sup>STOP</sup>* can indirectly increase grain cell wall esterified ferulate. An inverse  
129 interaction between levels of pCA and FA on arabinoxylan was also seen in transgenic rice<sup>7</sup>,  
130 switchgrass<sup>26</sup>, and *Setaria viridis*<sup>13</sup> where BAHD expression was manipulated.

131 Intrigued by the prevalence of *at10<sup>STOP</sup>* in 50% of our elite barley gene pool we were curious about  
132 whether this had any ecological, evolutionary, or performance-related significance. To explore, we  
133 PCR-sequenced a collection of 114 georeferenced barley landraces and 76 wild barley (*Hordeum*  
134 *spontaneum*) genotypes<sup>26</sup> across the *at10<sup>STOP</sup>* polymorphism (Supplementary Data 1). We found  
135 *at10<sup>STOP</sup>* to be extremely rare, present in three of 114 landraces and absent in all 76 wild genotypes  
136 (Supplementary Fig. 4a, Supplementary Data 1). The three landraces show a clear pattern of identity  
137 by descent, clustering in the same clade of the dendrogram (Supplementary Fig. 4a). We interpret  
138 these data as suggesting strong selection against the premature stop codon in wild germplasm and  
139 that *at10<sup>STOP</sup>* was a post-domestication mutation that under cultivation has no pronounced negative  
140 effects on fitness.

141 Several possibilities could explain enrichment of *at10<sup>STOP</sup>* in the cultivated gene pool. To explore, we  
142 first calculated genome wide  $F_{ST}$  by locus using two groups based on the *HvAT10* allele.  
143 HORVU7Hr1G084140 (a Serine/threonine-protein kinase not expressed in the lemma or palea) also  
144 had an  $F_{ST}$  of 1.0, and three other genes an  $F_{ST}$  above 0.875 (Supplementary Fig. 5a,b Supplementary  
145 Data 4). Based on their functional annotations and gene expression patterns (Supplementary Data  
146 4, Supplementary Fig. 5c) we observed no obvious reason for these to be under strong selection and  
147 responsible for enhancing the frequency of *at10<sup>STOP</sup>* via extended LD.

148 Next, due to the exclusive expression of *HvAT10* in the lemma and palea, we measured a series of  
149 grain morphometric traits across our panel. We found that, on average, grain from the *at10<sup>STOP</sup>*  
150 genotypes had significantly reduced grain width compared to cultivars with the wildtype allele (Table  
151 1) suggesting a potential role for arabinoxylan-esterified phenolic acids in modifying grain shape. Xu  
152 *et al*<sup>27</sup> previously identified a QTL hotspot on chromosome 7H for traits including grain area, and  
153 grain width. The eight 9K iSelect markers defining this QTL can be positioned on the current physical  
154 map at 482-500MB on 7H, corresponding to the location of *HvAT10*. Wang *et al*<sup>28</sup> also identified a  
155 QTL for grain length:width, grain perimeter, and grain roundness at the same location.

156 Prompted by these observations and the prevalence of registered UK barley varieties in our panel,  
157 we then explored grain parameters recorded in an extensive historical dataset from the UK's  
158 National and Recommended Lists trials 1988-2016<sup>29</sup>. Different grain quality phenotypes were  
159 available for up to 106 of our cultivars. Group comparisons of WT and *at10<sup>STOP</sup>* genotypes revealed  
160 surprising differences for hot water extract, diastatic power, germinative energy in 4ml, and wort  
161 viscosity (Table 1). In all cases, the group of *at10<sup>STOP</sup>* cultivars had poorer quality, offering no  
162 evidence of positive selection during breeding. The variation associated with the *HvAT10* locus is  
163 however highly significant and of potential interest for optimising grain quality traits (Table 1).

164 Finally, to understand more about the origin of the *at10<sup>STOP</sup>* in elite germplasm, we investigated its  
165 occurrence in the pedigree of our GWAS population. The earliest cultivar with *at10<sup>STOP</sup>* is *cv. Kenia*  
166 (cross between the Swedish landrace Gull and Danish landrace Binder) released in 1931 and  
167 subsequently introduced into NW European breeding programmes. Despite smaller grain and  
168 slightly poorer malting properties compared to its contemporary UK varieties, it established a long-  
169 standing position as a parent for further crop improvement due to its short stiff straw, earliness and  
170 high yield<sup>30</sup>. Several decades later, *at10<sup>STOP</sup>*-containing derivatives of Kenia, such as *cv. Delta*  
171 (National list 1959), were still being used as parents in our pedigree chart.

172 Taken together, we conclude that the continued prevalence of Kenia-derived germplasm may go  
173 some way to explaining the frequency of the *at10<sup>STOP</sup>* allele in our population. While this may simply  
174 be a straightforward genetic legacy of historical barley breeding, our data suggests that purging this  
175 mutation could assist the development of superior quality barley varieties. Conversely, much  
176 research has focussed on the beneficial bioactivity of ferulate in the diet and the *at10<sup>STOP</sup>* allele could  
177 enable breeding for increased ferulate in wholegrain products.

178 [2047 words]

## 179 **References**

- 180 1. Hatfield RD, Ralph J., & Grabber JH. Cell wall structural foundations: Molecular basis for  
181 improving forage digestibilities. *Crop Sci.* **39**, 27-37 (1999).
- 182 2. Calinoiu LF & VodnarDC. Whole grains and phenolic acids: a review on bioactivity,  
183 functionality, health benefits and bioavailability. *Nutrients* **10**, 1615 (2018).
- 184 3. Lentz M. The Impact of simple phenolic compounds on beer aroma and flavour.  
185 *Fermentation* **4**, 20 (2018).
- 186 4. Hatfield RD, Rancour DM. & Marita JM. Grass cell walls: a story of cross-linking. *Front. Plant*  
187 *Sci.* **7**, 2056 (2017).
- 188 5. Ralph J, et al. Peroxidase-dependent cross-linking reactions of *p*-hydroxycinnamates in plant  
189 cell walls. *Phytochem. Rev.* **3**, 79–96. (2004).
- 190 6. Withers S, Lu FC, Kim H, Zhu YM, Ralph J, Wilkerson CG. Identification of grass-specific  
191 enzyme that acylates monolignols with *p*-coumarate. *J Biol Chem.* **287**:8347–8355. (2012).
- 192 7. Bartley,LE. et al. Overexpression of a BAHD acyltransferase, OsAt10, alters rice cell wall  
193 hydroxycinnamic acid content and saccharification. *Plant Physiol.* **161**, 1615-1633 (2013).
- 194 8. Petrik DL, et al., *p*-Coumaroyl-CoA: monolignol transferase (PMT) acts specifically in the  
195 lignin biosynthetic pathway in *Brachypodium distachyon*. *Plant J.* **77**:713–726. (2014).

- 196 9. Marita JM, Hatfield RD, Rancour DM, Frost KE. Identification and suppression of the p-  
197 coumaroyl CoA: hydroxycinnamyl alcohol transferase in *Zea mays* L. *Plant J.* **78**:850–864.  
198 (2014).
- 199 10. Sibout R, Le Bris P, Legee F, Cezard L, Renault H, Lapierre C. Structural redesigning  
200 Arabidopsis lignins into alkali-soluble lignins through the expression of p-coumaroyl-coA:  
201 monolignol transferase PMT. *Plant Physiol.*; **170**:1358–1366. (2016).
- 202 11. Karlen SD, et al. Monolignol ferulate conjugates are naturally incorporated into plant lignins.  
203 *Sci Adv.* **2**:1–9. (2016).
- 204 12. Buanafina MMD, Fescemyer HW, Sharma M, Shearer EA. Functional testing of a PF02458  
205 homologue of putative rice arabinoxylan feruloyl transferase genes in *Brachypodium*  
206 *distachyon*. *Planta.* **243**:659–674. (2016).
- 207 13. De Souza WR et al. Suppression of a single BAHD gene in *Setaria viridis* causes large, stable  
208 decreases in cell wall feruloylation and increases biomass digestibility. *New Phytol.* **218**:81–  
209 93. (2018).
- 210 14. Mota et al. Suppression of a BAHD acyltransferase decreases p-coumaroyl on arabinoxylan  
211 and improves biomass digestibility in the model grass *Setaria viridis*. *Plant J.*  
212 <https://doi.org/10.1111/tbj.15046> (2020).
- 213 15. Petersen A, et al. On the hypothesis-free testing of metabolite ratios in genome-wide and  
214 metabolome-wide association studies. *BMC Bioinformatics* **13**, 120 (2012).
- 215 16. Daly P et al. RNAi-suppression of barley caffeic acid O-methyltransferase modifies lignin  
216 despite redundancy in the gene family. *Plant Biotechnol J* **17**; 3, 594-607 (2019).
- 217 17. Colmsee C et al. BARLEX - the Barley Draft Genome Explorer. *Mol Plant.* **8**(6):964-966.(2015).
- 218 18. Barron C et al. Assessment of biochemical markers identified in wheat for monitoring barley  
219 grain tissue. *J Cereal Sci.* **74**, 11-18. (2017).
- 220 19. Rapazote-Flores P, et al., BaRTv1.0: an improved barley reference transcript dataset to  
221 determine accurate changes in the barley transcriptome using RNA-seq. *BMC Genomics*  
222 **11**;20(1):968. (2019).
- 223 20. Ma X, Koepke J, Panjekar S, Fritsch G, Stöckigt J. Crystal structure of vinorine synthase, the  
224 first representative of the BAHD superfamily. *J Biol Chem.* Apr **8**;280(14):13576-83.(2005).
- 225 21. D’Auria ,JC. Acyltransferases in plants: a good time to be BAHD. *Curr Opin Plant Biol.*  
226 Jun;**9**(3):331-40. (2006)
- 227 22. Morales-Quintana, L., Alejandra Moya-Leon, M., Herrera, R. Computational study enlightens  
228 the structural role of the alcohol acyltransferase DFGWG motif. *J. Mol. Model.* **21**, 216 (2015)
- 229 23. Ralph, J. Hydroxycinnamates in lignification. *Phytochem Rev.* **9**, 65-83 2010.

- 230 24. Lapierre, C., Voxeur, A., Karlen, SD, Helm, RF. & Ralph J. Evaluation of Feruloylated and  
231 p-Coumaroylated Arabinosyl Units in Grass Arabinoxylans by Acidolysis in Dioxane/Methanol  
232 *J. Agric. Food Chem.* **66**, 5418–5424 (2018).
- 233 25. Li GT, et al, Overexpression of a rice BAHD acyltransferase in switchgrass (*panicum virgatum*  
234 L.) enhances saccharification. *BMC Biotechnol* **18**:54 (2018).
- 235 26. Russell J., et al. Exome sequencing of geographically diverse barley landraces and wild  
236 relatives gives insights into environmental adaptation. *Nat Genet* **48**, 1024–1030 (2016)
- 237 27. Xu X, et al. Genome-Wide Association Analysis of Grain Yield-Associated Traits in a Pan-  
238 European Barley Cultivar Collection. *The Plant Genome*, **11**: 1-11 170073. (2018).
- 239 28. Wang Q., et al. Dissecting the Genetic Basis of Grain Size and Weight in Barley (*Hordeum*  
240 *vulgare* L.) by QTL and Comparative Genetic Analyses. *Front. Plant Sci.* **10**, 469. (2019).
- 241 29. Looseley M, et al. Association mapping of malting quality traits in UK spring and winter  
242 barley cultivar collections. *Theor Appl Genet* **133**; 2567-2582. (2020)
- 243 30. Bell GDH. Barley breeding and related researches. *J Institute Brewing* **57**; 4, 247-260 (1951).

244

## 245 **Methods**

### 246 **Plant material and growth conditions**

247 Two populations of 2-row spring type barley were used to carry out the GWAS<sup>31</sup>. The first  
248 population includes 211 elite lines grown in a polytunnel under field conditions in Dundee, Scotland.  
249 For each line, 5 whole grains were ground to a fine powder using a ball mill (Mixer Mill MM400;  
250 Retsch Haan Germany) and stored in dry conditions until the HPLC analysis. The second population  
251 which was used for verification of the results of the analysis of the first subpopulation includes 128  
252 elite lines grown in a glasshouse compartment in a mix of clay-loam and cocopeat (50:50 v/v) at  
253 daytime and night time temperatures of 22°C and 15°C respectively in The Plant Accelerator,  
254 Adelaide, Australia. As described previously, the collection of germplasm these populations are  
255 sampled from has minimum population structure while maintaining as much genetic diversity as  
256 possible<sup>32</sup>. Mature grains were stored until phenolic acid content analysis.

### 257 **Genotyping of SNP markers**

258 All lines were genotyped using the 50K iSelect SNP genotyping platform described previously<sup>33</sup>. Prior  
259 to marker-trait association analysis, all markers with a minimum allele frequency of <5% and  
260 markers with missing data >5% were excluded from the analysis.

### 261 **Phenotyping for cell wall-bound phenolic acids**



262 A ~ 20 mg amount of wholegrain barley was used per sample. *Trans*-ferulic and *trans-p*-coumaric  
263 acid standards were purchased from SIGMA Aldrich (Castle Hill NSW, Australia). Standards were  
264 prepared at 62.5 µm, 250 µm and 1000 µm by dissolving the appropriate amount of powder in 50%  
265 methanol. Extraction of cell wall esterified phenolic acids was carried out following the methods  
266 described by <sup>34,35</sup> with the following modifications. Samples were washed twice with 500 µl 80%  
267 ethyl alcohol, with shaking for 10 minutes at room temperature to remove free phenolic acids. To  
268 release total cell wall esterified phenolic acids, alkaline treatment was carried out by adding 600 µl  
269 2M NaOH to the pellet. Samples were incubated on a rotary rack under nitrogen for 20 h in the dark  
270 at room temperature. Samples were centrifuged at 15000 x g for 15 minutes at room temperature,  
271 after which the supernatant was collected, acidified by adding 110 µl concentrated HCL and  
272 extracted three times with 1 mL ethyl acetate. Following each extraction, samples were centrifuged  
273 at 5000 x g for 7 minutes and the organic solution was collected. Extracts were combined,  
274 evaporated to dryness in a rotary evaporator and dissolved in 100 µl of 50 % methanol prior to  
275 injecting 40 µl into the HPLC column. For each sample two technical replicates were applied.

276

#### 277 **HPLC conditions**

278 An Agilent Technologies 1260 Infinity HPLC equipped with a Diode Array detector was used. Samples  
279 were analysed on an Agilent Poroshell 120 SB-C18 3.0x100mm 2.7- micron column kept at 30 C°.   
280 Eluents were A (0.5mM trifluoroacetic acid) and B (0.5mM trifluoroacetic acid, 40% methanol, 40%  
281 acetonitrile, 10% water). Starting conditions were 85% A and 15% B. Flow rate was 0.7 mL/min.  
282 Eluting gradients were as follow; min 0-10: 15% to 55% B, min 11-12: column washed with 100% B,  
283 min 13 back to the starting condition (85% A and 15% B). Detection was carried out at 280 nm and  
284 spectral data was collected from 200 to 400 nm when required. Ferulic and *p*-coumaric acid peaks  
285 were identified by comparing retention times and spectra to their corresponding standards. The  
286 area under the peaks was quantified at 280 nm for *trans* forms.

287

#### 288 **GWAS analysis of grain alkaline extractable pCA and FA and FA:pCA ratio**

289 Marker- trait association analysis was carried out using R 2.15.3 ([www.R-project.org](http://www.R-project.org)) and performed  
290 with a compressed mixed linear model<sup>36</sup> implemented in the GAPIT R package<sup>37</sup>. For phenotype  
291 values, the mean values of the barley wholegrain total alkaline extractable *trans*-ferulic and *trans-p*-  
292 coumaric acid (w/w) were used. To identify genes within intervals associated with our trait we used  
293 <sup>17</sup>. We also used the ratio of FA:pCA as a trait in our GWAS analysis. The ratio between the two  
294 compounds was log transformed i.e. log(FA:pCA) to provide a more normally distributed dataset.  
295 When using ratios in GWAS, a significant increase in the *p*-gain statistic<sup>15</sup> (a comparison between the

296 lowest  $-\log_{10}(p)$  values of the individual compounds and the  $-\log_{10}(p)$  value of the ratio) indicates  
297 that ratios carry more information than the corresponding metabolite concentrations alone. A  
298 significant p-gain identifies a biologically meaningful association between the individual compounds.  
299 We used  $B/(2*\alpha)$  to derive a critical value of  $3.42 \times 10^5$  for the FDR-adjusted p-gain, where  $\alpha$  is the  
300 level of significance (0.05) and B the number of tested metabolite pairs<sup>15</sup>. Therefore, as we tested  
301 two traits our threshold was  $2 \times 10^1$  and our p-gain was above this threshold.

302 To identify local blocks of LD, facilitating a more precise delimitation of QTL regions Linkage  
303 disequilibrium (LD) was calculated across the genome between pairs of markers using a sliding  
304 window of 500 markers and a threshold of  $R^2 < 0.2$  using Tassel v 5<sup>38</sup>. We anchored markers that  
305 passed FDR and represented initial borders of the QTL on 7H to the physical map and then expanded  
306 this region using local LD derived from genome wide LD analysis as described above. When the  
307 GWAS had not resulted in an association that passed the FDR we used the arbitrary threshold of -  
308  $\text{LOG}_{10}(P)$  to define the initial border. The SNP with the highest LOD score was used to represent the  
309 QTL. After identification and Sanger sequencing of the candidate gene *HvAT10* the GWAS was  
310 repeated including the allele present at the S309Stop as an additional marker.

#### 311 **Bioinformatics and gene identification**

312 We used BARLEX<sup>17</sup> to identify gene models present with the QTL defined by our analysis and their  
313 expression profile based on RNAseq data in 16 different tissues/ developmental stages

314

#### 315 **Phylogenetic analysis of barley BAHD acyltransferases**

316 Coding sequences of all BAHD acyltransferases with the PFAM domain PF02458 from rice, barley and  
317 *Brachypodium* were downloaded from the Ensembl Plants database (<http://plants.ensembl.org/>).  
318 Sequences were aligned using the MUSCLE alignment function<sup>39</sup> available in the Geneious 9.1.4  
319 (<https://www.geneious.com>). The translation alignment option was used. A neighbour-joining tree  
320 was produced from the alignment. Barley genes within group A and B clades were identified,  
321 realigned with their rice and *Brachypodium* orthologs and a maximum likelihood tree was produced  
322 from the translation alignment of the sequences. The following settings were applied: substitution  
323 model: General-Time-Reversible (GTR), branch support: bootstrap, number of bootstrap: 1000.

324

#### 325 **Resequencing and genotyping of *HvAT10* in the main and supplemental set**

326 Aligning the translation of AK376450 to Os06g39390 allowed the identification of the putative  
327 genomic sequence of *HvAT10*. We designed four pairs of primers, details of sequences and reaction  
328 conditions are in Supplementary Data 5, to amplify the full length CDS using reaction volumes,

329 reagents, and conditions as described in<sup>40</sup>. To facilitate quick and efficient genotyping of large  
330 numbers of cultivars we subsequently designed a KASP genotyping assay to a SNP at 430bp in  
331 *HvAT10* (Supplementary Data 5). Reactions were performed in an 8.1  $\mu$ L reaction volume, with 3  $\mu$ L  
332 H<sub>2</sub>O, 1  $\mu$ L DNA (20ng/ $\mu$ L), 4  $\mu$ L KASP genotyping master mix, and 0.11  $\mu$ L of the KASP assay.  
333 Box plots to demonstrate the contribution of the SNP at 436bp in *HvAT10* to variation in grain pCA  
334 and FA content were produced using R 2.15.3 ([www.R-project.org](http://www.R-project.org)). To test for identity by descent of  
335 the *HvAT10* allele within the set of accessions using for the GWAS a dendrogram was constructed  
336 using maximum likelihood using the genotypic data from the 9k-select array<sup>32</sup> in MEGA7<sup>41</sup> with  
337 default settings except for including bootstrapping and visualised in FigTree (v.1.4.4)  
338 <http://tree.bio.ed.ac.uk/software/figtree/>.

### 339 **Characterisation of diversity of *HvAT10* in *H. spontaneum* from the fertile crescent and barley** 340 **landraces.**

341 DNA was extracted as described above from 76 *H. spontaneum* and 114 barley landraces from<sup>26</sup>. The  
342 S309Stop SNP was PCR amplified and Sanger sequenced with primer pair 5 using conditions  
343 described above. A dendrogram was constructed using maximum likelihood using 4000 exome  
344 capture derived SNPs from<sup>26</sup> in MEGA7<sup>41</sup> with default settings except for including bootstrapping and  
345 visualised in FigTree ( v.1.4.4) <http://tree.bio.ed.ac.uk/software/figtree/>.

346

### 347 **Genome wide $F_{ST}$ analysis**

348 The fixation index ( $F_{ST}$ ) is a measure of genetic differentiation between groups of individuals.  
349 Genome wide  $F_{ST}$  was calculated by locus using GenAlEx 6.502<sup>42,43</sup> after dividing the accessions into  
350 two populations based on their *HvAT10* allele using all informative 50K iSelect markers.

351

### 352 **Phenotypic analysis of cultivars with wildtype vs *at10*<sup>STOP</sup> allele**

353 We characterised mature grain morphology using from plants grown in a polytunnel under field  
354 conditions in Dundee, Scotland as described above, over two years (2010 and 2011). Grain area,  
355 width and length were quantified using the MARVIN Seed Analyzer (GTA Sensorik GmbH, 2013).  
356 BLUPs calculated from this data using R 2.15.3 ([www.R-project.org](http://www.R-project.org)) were used in subsequent  
357 comparisons between allelic groups.

358

### 359 **Data availability**

360 All sequences of *HvAT10* generated in this study are available from NCBI, accession numbers are  
361 provided in **Supplementary Table 1**.

362

363 **References (for methods section)**

- 364 31. Oakey H, et al. Identification of crop cultivars with consistently high lignocellulosic sugar  
365 release requires the use of appropriate statistical design and modelling. *Biotechnol Biofuels*  
366 **6**, 185 (2013).
- 367 32. Comadran et al. Natural variation in a homolog of *Antirrhinum* CENTRORADIALIS contributed  
368 to spring growth habit and environmental adaptation in cultivated barley. *Nat*  
369 *Genet.* **44**:1388–1392(2012)
- 370 33. Bayer MM, et al. Development and Evaluation of a Barley 50k iSelect SNP Array. *Front Plant*  
371 *Sci* **8**(1792) (2017).
- 372 34. Hernanz D, et al. Hydroxycinnamic Acids and Ferulic Acid Dehydrodimers in Barley and  
373 Processed Barley. *Journal of Agricultural and Food Chemistry* **49**(10):4884-4888 (2001).
- 374 35. Irakli MN, Samanidou VF, Biliaderis CG, Papadoyannis IN: Development and validation of an  
375 HPLC-method for determination of free and bound phenolic acids in cereals after solid-phase  
376 extraction. *Food chemistry* **134**(3):1624-1632 (2012).
- 377 36. Zhang Z, et al: Mixed linear model approach adapted for genome-wide association studies.  
378 *Nat Genet*, **42**(4):355-360 (2010).
- 379 37. Lipka AE, et al. GAPIT: genome association and prediction integrated tool. *Bioinformatics*  
380 **28**(18):2397-2399 (2012).
- 381 38. Bradbury PJ, et al. TASSEL: software for association mapping of complex traits in diverse  
382 samples. *Bioinformatics* **23**(19):2633-2635 (2007).
- 383 39. Edgar RC. MUSCLE: multiple sequence alignment with high accuracy and high throughput.  
384 *Nucleic Acids Res.***32**(5):1792-1797 (2004).
- 385 40. Houston K, et al. Analysis of the barley bract suppression gene *Trd1*. *Theor Appl Genet*,  
386 **125**(1):33-45 (2012).
- 387 41. Kumar S, Stecher G, Tamura K. MEGA7: molecular evolutionary genetics analysis version 7.0  
388 for bigger datasets. *Mol Biol Evol* . **33**(7):1870–1874(2016).
- 389 42. Peakall, R. and Smouse P.E. GENALEX 6: genetic analysis in Excel. Population genetic  
390 software for teaching and research. *Mol Ecol Notes*. **6**, 288-295 (2006).
- 391 43. Peakall, R. and Smouse P.E. GenALEX 6.5: genetic analysis in Excel. Population genetic  
392 software for teaching and research-an update. *Bioinformatics* **28**, 2537-2539 (2012).

393 **Acknowledgements**

394 KH and RW acknowledge support from the Rural & Environment Science & Analytical Services  
395 Division of the Scottish Government and BBSRC (BB/J014869/1, BB/L026317/1). CH and RW are

396 grateful for funding from BBSRC (BB/N023455/1 and BB/G016232/1). Amy Learmonth was  
397 supported by BBSRC grant BB/J01446X/1. ML and KH acknowledge funding from BB/K008188/1.  
398 We would also like to acknowledge technical support from Malcolm Macaulay and advice on analysis  
399 from Helen Oakey. RB, ASH, and Alan Little acknowledge funding provided by the Australian  
400 Research Council Centre of Excellence in Plant Cell Walls CE110001007.

401

#### 402 **Author contributions**

403 RW, KH, RB, CH, Alan Little, designed experiments. KH, ASH, JL, Amy Learmonth, carried out  
404 experiments. KH, ASH, Amy Learmonth, ML, Alan Little, JL analysed data. The manuscript was  
405 written by CH, KH, RW, RB, Amy Learmonth, ASH with contributions from all other authors.

406

#### 407 **Ethics declarations**

408 The authors declare no competing interests.

#### 409 **Tables**

410

411 **Table 1 - T-test results for comparisons between *HvAT10* alleles.** For grain area, length and width  
412 data are available in Supplementary Data 1 and analysis was carried out using BLUPS derived from 2  
413 – years' worth of samples. Data used for comparison of hot water extract, germinative energy,  
414 fermentable extract, diastatic power, wort viscosity and friability between *HvAT10* alleles are  
415 published<sup>29</sup>.

416

|                  | Grain<br>Area | Grain<br>Length<br>(mm) | Grain<br>Width<br>(mm) | Hot water<br>extract<br>( $^{\circ}$ /Kg) | Germinative<br>energy 4 ml<br>(%) | Fermentable<br>extract | Diastatic<br>power<br>loB | Wort<br>viscosity<br>(mPa/s) | Friability<br>(%) |
|------------------|---------------|-------------------------|------------------------|-------------------------------------------|-----------------------------------|------------------------|---------------------------|------------------------------|-------------------|
| <i>at10 STOP</i> | 27.67         | 9.02                    | 3.92                   | 309.44                                    | 97.34                             | 70.72                  | 100.77                    | 1.5                          | 87.97             |
| WT               | 28.16         | 9.09                    | 3.97                   | 311.23                                    | 97.4                              | 70.88                  | 106.07                    | 1.48                         | 89.95             |
| <i>p</i> value   | 0.0214*       | 0.152                   | 0.0009***              | 0.0005***                                 | 0.0206*                           | 0.0203*                | 0.0282*                   | 0.0009***                    | 0.0123*           |

417

418

419 **Figures**

420

421 **Figure 1. Detecting regions of the barley genome associated with grain phenolic acid content using**  
422 **a collection of 211 spring 2-row barleys.** Manhattan plots of the GWAS of the phenolic acid content  
423 of wholegrain 2-row spring barley indicating regions of the genome associated with grain **a.** *p*-  
424 coumaric acid, **b.** ferulic acid content, **c.** using the a ratio of these two phenolic acids calculated by  
425  $\log[\text{FA}:\text{p-Coumaric acid}]$ . The  $-\log_{10}(\text{P-value})$  is shown on the Y axis, and the X axis shows the 7  
426 barley chromosomes. The FDR threshold =  $-\log_{10}(\text{P})=6.02$ , plots use numerical order of markers on  
427 the physical map.  
428

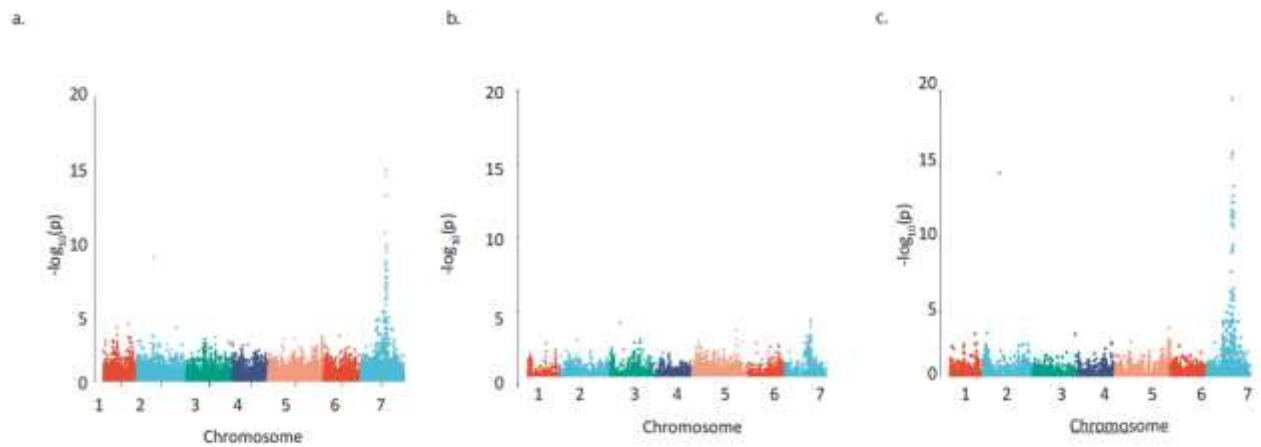

429

430

431

432 **Figure 2. Putative candidates contributing to variation in grain *p*-coumaric (pCA) and Ferulic (FA)**  
433 **content from GWAS. a.** Expression pattern for candidate genes under GWAS peak on 7H for grain *p*-  
434 coumaric and ferulic acid content in 16 different tissues/ developmental stages. Values are FPKM  
435 and a scale bar is provided. This expression data is derived from the publicly available RNAseq  
436 dataset BARLEX, <https://apex.ipk-gatersleben.de/apex/f?p=284:39> **b.** Phenolic acid autofluorescence  
437 in whole grain sections. En: Endosperm, Al: Aleurone, Pe: Pericarp and Hu: Husk. Scale bar = 100µm  
438 **c.** Phylogenetic tree of the *BAHD* acyltransferases. A maximum-likelihood tree of the translation  
439 alignment of the coding sequences of group A and B *BAHD* genes from barley, rice and  
440 *Brachypodium*. Bootstrap support for branches is provided. Horvu numbers represent the barley  
441 gene models in green, BRADI represents *Brachypodium* in purple, and *Os* represents the rice genes in  
442 orange. The clade including LOC\_OS06g39390 and HORVU7Hr1G085060 is highlighted in blue,  
443 *OsAT10* is indicated in green and the closest barley orthologue is marked in red. Where function of a  
444 gene model has been assigned the relevant reference is provided. Black text in bold indicates branch  
445 names, both *BAHD* and *AT*<sup>13</sup>.  
446

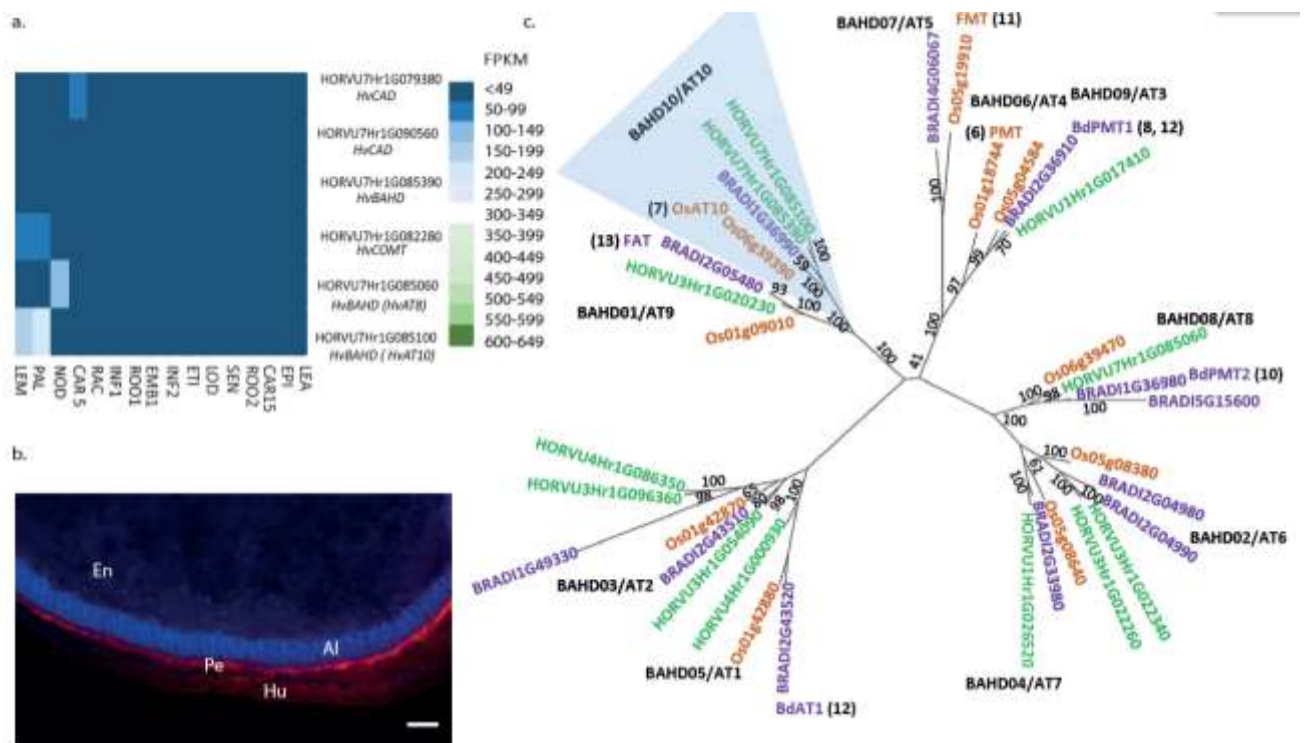

447  
448

449 **Figure 3. Gene and protein models for *HvAT10*.** a. Gene model for *HvAT10* including location, and  
450 effect of SNPs detected from resequencing this gene in the 211 barley cultivars which have been  
451 assayed for *p*-coumaric and ferulic acid. The numbering above the gene model represent locations in  
452 the CDS which vary between these cultivars. The SNP, and the resulting change in the particular  
453 amino acid are indicated underneath the gene model. The full length of the gene is 2117bp (with a  
454 CDS of 1302bp) which translates to a protein of 435 amino acids as indicated. Protein model for  
455 translation of *HvAT10*. b. a Full length protein and c. when the premature stop codon is present this  
456 results in a truncated protein. Box plots demonstrate the effect of the SNP at 929bp within *HvAT10*  
457 where the grain of the 211 barley cultivars were quantified for d. *p*-coumaric acid levels and e.  
458 ferulic acid levels. f. Correlation between pCA and FA content based on *HvAT10* allele using 211  
459 lines. The allele which results in full length version of *HvAT10* are in pink, and the allele leading to a  
460 premature stop codon are coloured blue.  
461

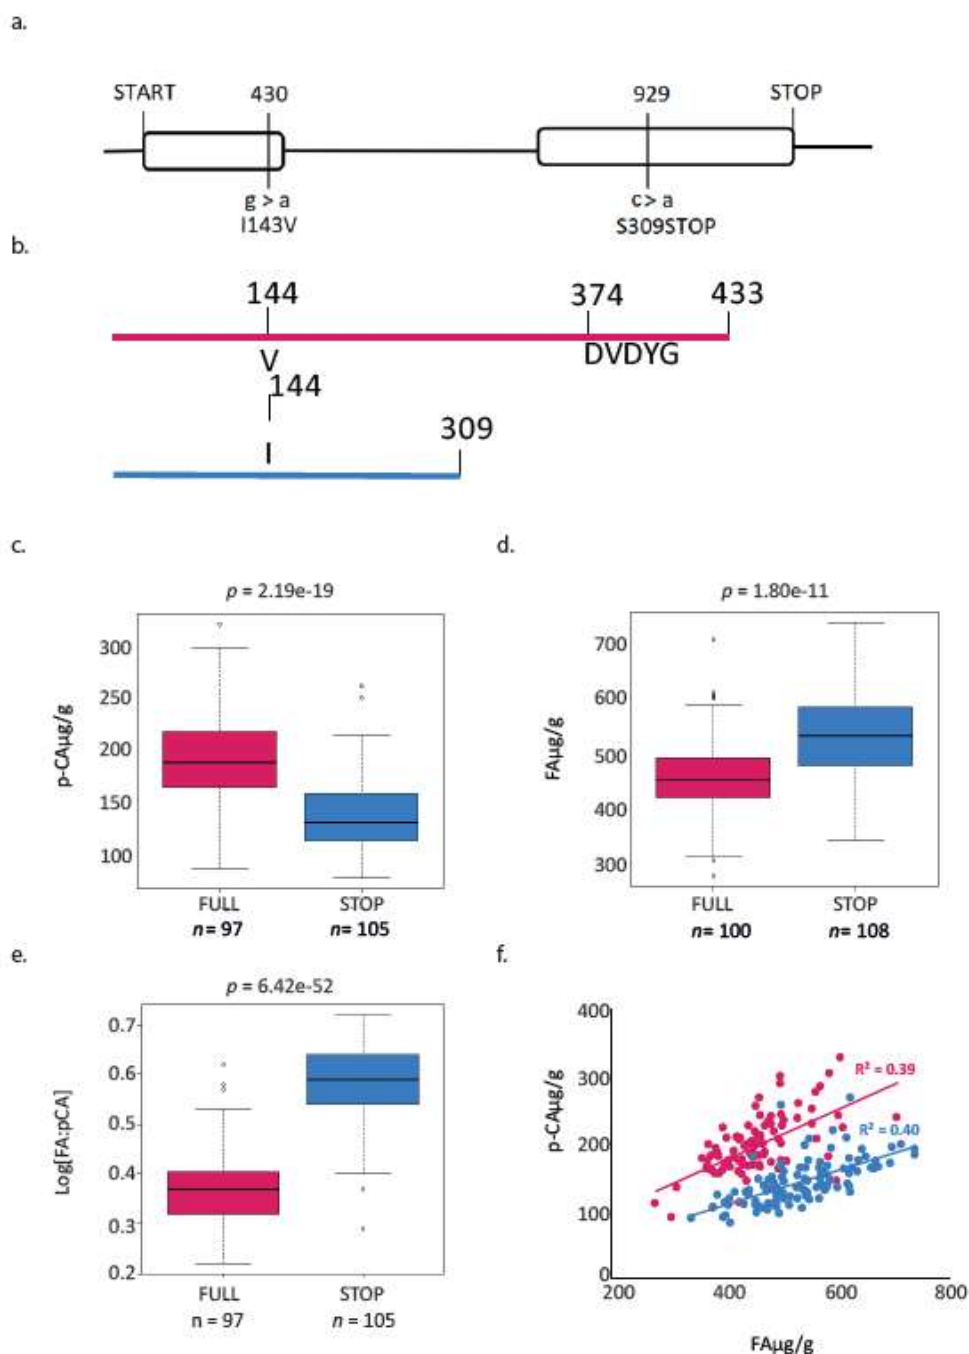



463 **Supplementary Information**

464 **Supplementary Data 1. Phenolic acid and genetic data for all cultivars included in this study.** *p*-  
465 coumaric and ferulic acid content, KASP data and NCBI number for those lines that were sequenced  
466 for *HvAT10* is included.

467  
468 **Supplementary Data 2. Summary of number of accessions used for each GWAS.** A total of 211  
469 accessions were included in the main dataset but data for both phenolic acids is not available for all  
470 lines, therefore the number of individuals included in different analysis varies. Includes number of  
471 accessions for the GWAS presented in the main and supplementary analysis for both individual trait  
472 and the ratio analysis. Number of individuals with each allele of *HvAT10* based on genotyping of  
473 A430G is also included.

474  
475 **Supplementary Data 3. Details of QTL identified on 7H for all analysis carried out.** Physical location,  
476 LOD score, and 50k iSelect marker with the highest LOD score are provided. \* indicates that analysis  
477 passed the FDR threshold of  $-\log_{10}(p)=6.1$ .

478  
479 **Supplementary Data 4. Gene models containing SNPs that have an  $F_{ST}>0.875$  when  $F_{ST}$  analysis**  
480 **carried out based on *HvAT10* allele.** This table includes 50k iSelect marker name, the chromosome  
481 the marker is located on, gene model and annotation based on Morex v1 Gene Models (2016).

482  
483 **Supplementary Data 5. Details of primers and genotyping assays used in this study.** This includes  
484 details of primers for Sanger sequencing and KASP genotyping assay sequence for *HvAT10*.

485  
486 **Supplementary Figure 1. Phenolic acid content of wholegrain flour from 211 2-row spring barleys**  
487 **linea. a. *p*CA and b. ferulic acid content.** Values represent the mean for FA and *p*CA expressed as  
488 w/w. Error bars represent standard deviation of the replicates.

489  
490 **Supplementary Figure 2. Manhattan plots of the GWAS of the phenolic acid content of wholegrain**  
491 **flour from 128 2-row spring barley lines indicating regions of the genome associated with grain**  
492 **phenolic acid content.** Manhattan plots of the GWAS of the phenolic acid content of wholegrain 2-  
493 row spring barley indicating regions of the genome associated with grain a. *p*-coumaric acid, b.  
494 ferulic acid content and c.  $\log[FA:p\text{-Coumaric acid}]$ . The  $-\log_{10}(P\text{-value})$  is shown on the Y axis, and  
495 the X axis shows the 7 barley chromosomes. FDR threshold =  $-\log_{10}(P)=6.02$ , plots use numerical  
496 order of markers on the physical map.

497  
498 **Supplementary Figure 3. Distribution of ratio between two phenolic acids quantified in the grain**  
499 **of 211 spring 2 row barleys lines and used to carry out GWAS.** The ratio was calculated as  $\log[FA:p\text{-}$   
500  $\text{Coumaric acid}]$ . Accessions containing the allele which results in a full length version of *HvAT10* are  
501 in pink, and accessions containing the allele leading to a premature stop codon are coloured blue.

502  
503 **Supplementary Figure 4. Distribution of the *HvAT10* premature stop codon in *H. vulgare* landraces**  
504 **and cultivated barley lines. a.** A dendrogram of 114 *H. vulgare* landraces constructed using a  
505 selection of SNPs with a genome-wide distribution with maximum likelihood methods. **b.** A  
506 dendrogram of cultivated barley germplasm using a selection of SNPs with a genome-wide  
507 distribution using maximum likelihood methods. Accessions containing the allele which results in  
508 full length version of *HvAT10* are in pink, and accessions containing the allele leading to a premature  
509 stop codon are coloured blue.

510  
511 **Supplementary Figure 4.  $F_{ST}$  analysis based on *HvAT10*.** a. Plot displaying genome wide  $F_{ST}$  with  $F_{ST}$   
512 index provided on the Y axis, an  $F_{ST}$  of 1 indicating a complete fixation of each allele within the two  
513 subpopulations determined by their allele of *HvAT10*. b. Just  $F_{ST}$  of markers at 7H. Red box indicates

514 location of the centromere. Two SNPs whose location overlap on this plot, including one in *HvAT10*,  
515 have an  $F_{ST}$  of 1.0. Note shape of peak appears different in **a.** and **b.** due to the difference in scale of  
516 the plots. **c.** RNAseq data for genes with  $F_{ST}>0.875$  from 16 different tissues/ developmental stages.  
517 Values are FPKM and a scale bar is provided. This expression data is derived from the publicly  
518 available RNAseq dataset BARLEX, <https://apex.ipk-gatersleben.de/apex/f?p=284:39>
